# Supplementary material for: Exploring the missing heritability in subjects with hearing loss, enlarged vestibular aqueducts, and a single or no pathogenic SLC26A4 variant
Source: PubMed Central journal article supplement (PMC9035008; doi:10.1007/s00439-021-02336-6), 2021-08-19
Supplement: 439_2021_2336_MOESM1_ESM.pdf [file 439_2021_2336_MOESM1_ESM.pdf]

## SUPPLEMENTARY TABLES

**Table S1: Genotype of reference cohort with biallelic pathogenic variants in *SLC26A4***

| Case   | Allele 1                      |      | Allele 2                      |      |
|--------|-------------------------------|------|-------------------------------|------|
|        | Variant                       | ACMG | Variant                       | ACMG |
| SLC087 | c.1147del; p.(Gln383Argfs*49) | UV5  | c.1147del; p.(Gln383Argfs*49) | UV5  |
| SLC088 | c.2T>C; p.(Met1?)             | UV5  | c.707T>C; p.(Leu236Pro)       | UV5  |
| SLC089 | c.890del; p.(Pro297Glnfs*6)   | UV5  | c.1246A>C; p.(Thr416Pro)      | UV5  |
| SLC090 | c.1001+1G>A; p.(?)            | UV5  | c.1001+1G>A; p.(?)            | UV5  |
| SLC091 | c.1225C>T; p.(Arg409Cys)      | UV5  | c.707T>C; p.(Leu236Pro)       | UV5  |
| SLC092 | c.1694G>A; p.(Cys565Tyr)      | UV5  | c.707T>C; p.(Leu236Pro)       | UV5  |
| SLC093 | c.754T>C; p.(Ser252Pro)       | UV4  | c.1174A>T; p.(Asn392Tyr)      | UV5  |
| SLC094 | c.2048T>C; p.(Phe683Ser)      | UV5  | c.707T>C; p.(Leu236Pro)       | UV5  |
| SLC095 | c.1246A>C; p.(Thr416Pro)      | UV5  | c.707T>C; p.(Leu236Pro)       | UV5  |

Genotype of a control cohort of nine subjects with two (likely) pathogenic variants in the coding or splice site regions of *SLC26A4* and a Pendred syndrome phenotype. Segregation analysis to confirm biallelic occurrence of the variants could be carried out in all subjects, except for subjects SLC091 and SLC92. ACMG, variant classification according to the American College of Medical Genetics and Genomics (ACMG) classification guidelines (Oza et al. 2018); UV4, likely pathogenic; UV5, pathogenic.

**Table S2: Details of applied next generation sequencing methods**

| Case   | Sequencing method | Platform           | % Reads coverage<br>≥ 20x | Mean coverage<br>(x reads) |
|--------|-------------------|--------------------|---------------------------|----------------------------|
| SLC002 | WGS               | BGISeq500          | 88.14                     | 36                         |
| SLC003 | MIPS              | NextSeq500         | 94.78                     | 920                        |
| SLC012 | WGS               | BGISeq500          | 88.45                     | 37                         |
| SLC013 | MIPS              | NextSeq500         | 91.78                     | 900                        |
| SLC014 | MIPS              | NextSeq500         | 92.28                     | 815                        |
| SLC015 | WES               | Illumina HiSeq2000 | 96.84                     | 115                        |
| SLC017 | WES               | Illumina HiSeq2000 | 96.70                     | 125                        |
| SLC018 | WGS               | BGISeq500          | 88.77                     | 39                         |
| SLC031 | MIPS              | NextSeq500         | 93.31                     | 517                        |
| SLC032 | WGS               | BGISeq500          | 89.62                     | 43                         |
| SLC036 | WGS               | BGISeq500          | 89.21                     | 41                         |
| SLC039 | MIPS              | NextSeq500         | 93.33                     | 676                        |
|        | WGS               | BGISeq500          | 89.21                     | 41                         |
| SLC040 | WES               | Illumina HiSeq4000 | 93.50                     | 136                        |
| SLC043 | WES               | Illumina HiSeq2000 | 94.85                     | 111                        |
| SLC045 | MIPS              | NextSeq500         | 92.28                     | 590                        |
|        | WGS               | BGISeq500          | 83.83                     | 30                         |
| SLC048 | WGS               | BGISeq500          | 88.82                     | 38                         |
| SLC052 | WES               | Illumina HiSeq2000 | 93.77                     | 103                        |
| SLC056 | MIPS              | NextSeq500         | 95.21                     | 901                        |
| SLC069 | WES               | Illumina HiSeq2000 | 96.62                     | 130                        |
| SLC070 | WES               | Illumina HiSeq4000 | 97.18                     | 118                        |
| SLC071 | WES               | Illumina HiSeq4000 | 97.33                     | 121                        |
| SLC073 | MIPS              | NextSeq500         | 94.99                     | 880                        |
| SLC078 | MIPS              | NextSeq500         | 95.63                     | 1017                       |
| SLC079 | WES               | Illumina HiSeq4000 | 97.17                     | 101                        |
|        | LRS               | Sequel II PacBio   | NA                        | 12                         |
| SLC080 | WES               | Illumina HiSeq4000 | 97.40                     | 115                        |
|        | WGS               | BGISeq500          | 85.27                     | 30                         |
| SLC084 | WES               | Illumina HiSeq4000 | 98.01                     | 123                        |
| SLC085 | WGS               | BGISeq500          | 80.33                     | 30                         |
| SLC086 | WES               | Illumina HiSeq4000 | 97.34                     | 123                        |

WES, whole exome sequencing; WGS, short-read whole genome sequencing; MIPS, molecular inversion probe sequencing; LRS, long-read whole genome sequencing; NA, not applicable.

**Table S3: Genes analyzed by MIP sequencing**

|                 |                |                 |                 |
|-----------------|----------------|-----------------|-----------------|
| <i>ACTG1</i>    | <i>EPS8</i>    | <i>LRTOMT</i>   | <i>RIPOR2</i>   |
| <i>ADCY1</i>    | <i>ESPN</i>    | <i>MARVELD2</i> | <i>S1PR2</i>    |
| <i>ADGRV1</i>   | <i>ESRRB</i>   | <i>MCM2</i>     | <i>SERPINB6</i> |
| <i>AIFM1</i>    | <i>EYA1</i>    | <i>MIR96</i>    | <i>SIX1</i>     |
| <i>ATP1A2</i>   | <i>EYA4</i>    | <i>MITF</i>     | <i>SIX5</i>     |
| <i>BDP1</i>     | <i>GIPC3</i>   | <i>MPZL2</i>    | <i>SLC9A1</i>   |
| <i>BSND</i>     | <i>GJB2</i>    | <i>MSRB3</i>    | <i>SLC17A8</i>  |
| <i>CABP2</i>    | <i>GJB3</i>    | <i>MYH14</i>    | <i>SLC22A4</i>  |
| <i>CCDC50</i>   | <i>GJB6</i>    | <i>MYH9</i>     | <i>SLC26A4</i>  |
| <i>CD164</i>    | <i>GPSM2</i>   | <i>MYO15A</i>   | <i>SLC26A5</i>  |
| <i>CDH23</i>    | <i>GRHL2</i>   | <i>MYO3A</i>    | <i>SMPX</i>     |
| <i>CEACAM16</i> | <i>GRM7</i>    | <i>MYO6</i>     | <i>SNAI2</i>    |
| <i>CIB2</i>     | <i>GRM8</i>    | <i>MYO7A</i>    | <i>SOX10</i>    |
| <i>CLDN14</i>   | <i>GRXCR1</i>  | <i>NARS2</i>    | <i>STRC</i>     |
| <i>CLIC5</i>    | <i>GRXCR2</i>  | <i>NAT2</i>     | <i>SYNE4</i>    |
| <i>CLPP</i>     | <i>GSDME</i>   | <i>OSBPL2</i>   | <i>TBC1D24</i>  |
| <i>CLRN1</i>    | <i>HARS2</i>   | <i>OTOA</i>     | <i>TECTA</i>    |
| <i>COCH</i>     | <i>HGF</i>     | <i>OTOF</i>     | <i>TJP2</i>     |
| <i>COL11A2</i>  | <i>HOMER2</i>  | <i>OTOG</i>     | <i>TMC1</i>     |
| <i>COL4A6</i>   | <i>HSD17B4</i> | <i>OTOGL</i>    | <i>TMEM132E</i> |
| <i>CRYM</i>     | <i>ILDR1</i>   | <i>P2RX2</i>    | <i>TMIE</i>     |
| <i>DCDC2</i>    | <i>KARS</i>    | <i>PAX3</i>     | <i>TMPRSS3</i>  |
| <i>DFNB31</i>   | <i>KCNE1</i>   | <i>PCDH15</i>   | <i>TNC</i>      |
| <i>DFNB59</i>   | <i>KCNJ10</i>  | <i>PDZD7</i>    | <i>TPRN</i>     |
| <i>DIABLO</i>   | <i>KCNQ1</i>   | <i>PNPT1</i>    | <i>TRIOBP</i>   |
| <i>DIAPH1</i>   | <i>KCNQ4</i>   | <i>POU3F4</i>   | <i>TSPEAR</i>   |
| <i>DSPP</i>     | <i>KITLG</i>   | <i>POU4F3</i>   | <i>USH1C</i>    |
| <i>EDN3</i>     | <i>LARS2</i>   | <i>PRPS1</i>    | <i>USH1G</i>    |
| <i>EDNRB</i>    | <i>LHFPL5</i>  | <i>PTPRQ</i>    | <i>USH2A</i>    |
| <i>ELMOD3</i>   | <i>LOXHD1</i>  | <i>RDX</i>      | <i>WFS1</i>     |

**Table S4: Compound heterozygous or homozygous variants in arHL-associated genes**

| Case   | Class | Gene         | Transcript  | cDNA      | Protein       | In-house AF (%) | gnomAD AF (%) | CADD_PPHRED | SIFT | PPH2  | MutationTaster  | SpliceAI | ACMG |
|--------|-------|--------------|-------------|-----------|---------------|-----------------|---------------|-------------|------|-------|-----------------|----------|------|
| SLC012 | M1    | <i>OTOGL</i> | NM_173591.3 | c.890C>T  | p.(Pro297Leu) | 0.09            | 0.12          | 22.5        | 0    | 1.0   | Disease causing | -        | UV2  |
|        |       | <i>OTOGL</i> | NM_173591.3 | c.1369G>T | p.(Val457Leu) | 0.02            | 0.00          | 15.4        | 0    | 0.683 | Disease causing | -        | UV3  |

Homozygous or compound heterozygous variants detected in coding or splice site regions (+/-14 nucleotides) of genes associated with autosomal recessive hearing loss (arHL). Variants are selected based on an allele frequency of  $\leq 0.5\%$  in gnomAD and the in-house database. Scores that meet the thresholds for pathogenicity as described in the methods section are indicated in red. Thresholds for pathogenicity: CADD-PHRED ( $\geq 15$ ), SIFT ( $\leq 0.05$ ), PolyPhen-2 ( $\geq 0.450$ ), MutationTaster (deleterious) and spliceAI ( $\geq 0.1$ ). In-house AF, allele frequency (%) in in-house database (~7,500 exomes); GnomAD AF, allele frequency (%) in gnomAD database V.2.1.1; CADD\_PPHRED, Combined Annotation Dependent Depletion PHRED score; SIFT, Scale-Invariant Feature Transform; PPH2, Poly-Phen-2 score; MutationTaster (prob), MutationTaster score with probability (0-1); spliceAI, splicing prediction score; ACMG, variant classification according to the American College of Medical Genetics and Genomics (ACMG) classification guidelines (Oza et al. 2018); UV2, likely benign; UV3, uncertain significance.

**Table S5: List of *cis* regulatory elements of *SLC26A4***

| Gene                        | Start     | End       | Source            |
|-----------------------------|-----------|-----------|-------------------|
| <i>SLC26A4, SLC26A4-AS1</i> | 106740447 | 106742845 | GeneHancer V5.0   |
| <i>SLC26A4, SLC26A4-AS1</i> | 106743446 | 106747050 | GeneHancer V5.0   |
| <i>SLC26A4, SLC26A4-AS1</i> | 106762501 | 106763480 | GeneHancer V5.0   |
| <i>SLC26A4, SLC26A4-AS1</i> | 107103661 | 107105444 | GeneHancer V5.0   |
| <i>SLC26A4, SLC26A4-AS1</i> | 107120646 | 107123445 | GeneHancer V5.0   |
| <i>SLC26A4, SLC26A4-AS1</i> | 107199656 | 107223646 | GeneHancer V5.0   |
| <i>SLC26A4, SLC26A4-AS1</i> | 107219645 | 107223646 | GeneHancer V5.0   |
| <i>SLC26A4, SLC26A4-AS1</i> | 107232401 | 107238444 | GeneHancer V5.0   |
| <i>SLC26A4-AS1</i>          | 107234760 | 107236310 | EnhancerAtlas 2.0 |
| <i>SLC26A4, SLC26A4-AS1</i> | 107254046 | 107255844 | GeneHancer V5.0   |
| <i>SLC26A4, SLC26A4-AS1</i> | 107262447 | 107263690 | GeneHancer V5.0   |
| <i>SLC26A4, SLC26A4-AS1</i> | 107276447 | 107280445 | GeneHancer V5.0   |
| <i>SLC26A4, SLC26A4-AS1</i> | 107301300 | 107302040 | EnhancerAtlas 2.0 |
| <i>SLC26A4, SLC26A4-AS1</i> | 107301445 | 107302845 | GeneHancer V5.0   |
| <i>SLC26A4, SLC26A4-AS1</i> | 107330247 | 107335644 | GeneHancer V5.0   |
| <i>SLC26A4</i>              | 107334930 | 107335060 | EnhancerAtlas 2.0 |
| <i>SLC26A4</i>              | 107336480 | 107338480 | EnhancerAtlas 2.0 |
| <i>SLC26A4</i>              | 107350640 | 107352980 | EnhancerAtlas 2.0 |
| <i>SLC26A4, SLC26A4-AS1</i> | 107382558 | 107387330 | GeneHancer V5.0   |
| <i>SLC26A4, SLC26A4-AS1</i> | 107495047 | 107499844 | GeneHancer V5.0   |
| <i>SLC26A4, SLC26A4-AS1</i> | 107531740 | 107533640 | EnhancerAtlas 2.0 |
| <i>SLC26A4</i>              | 107564530 | 107564670 | EnhancerAtlas 2.0 |
| <i>SLC26A4, SLC26A4-AS1</i> | 107643420 | 107643550 | EnhancerAtlas 2.0 |
| <i>SLC26A4</i>              | 107743680 | 107744940 | EnhancerAtlas 2.0 |

List of human *cis* regulatory elements associated with *SLC26A4* or *SLC26A4-AS1* that are collected in the GeneHancer database V5.0(Fishilevich et al. 2017) or the EnhancerAtlas 2.0.(Gao and Qian 2020) Only *cis* regulatory elements with an enhancer score >0.7 and an enhancer-gene interaction score >7 were extracted from Genehancer. For EnhancerAtlas 2.0, all enhancer elements that were experimentally determined in human tissues or cell types were selected. Start and End; Genomic positions on chromosome 7 according to GRCh37/hg19.

**Table S6: Heterozygous variants in (predicted) *cis* regulatory elements of *SLC26A4***

| Case   | Class | Variant           | gnomAD AF (%) | Regulatory element        | Source        | Identifier  | Enhancer score | Enhancer-gene score | PhyloP |
|--------|-------|-------------------|---------------|---------------------------|---------------|-------------|----------------|---------------------|--------|
| SLC002 | M1    | Chr7:107220628C>A | -1            | Chr7: 107219645-107223646 | GeneHancer V5 | GH07J107579 | 2.05           | 10.54               | -1.143 |
| SLC045 | M1    | Chr7:107384987C>G | 0.19          | Chr7:107382558-107387330  | GeneHancer V5 | GH07J107742 | 2.25           | 10.63               | 0.183  |

A list of potential *cis* regulatory elements of *SLC26A4* (GeneHancer V5(Fishilevich et al. 2017) and EnhancerAtlas V2(Gao and Qian 2020)) was screened for the presence of rare heterozygous variants (allele frequency  $\leq 0.5\%$ ) in available whole genome sequencing datasets. For none of the variants, the loss of a transcription factor binding site (TFBS) is predicted (JASPAR database(Fornes et al. 2020),  $>80\%$  TFBS confidence score and a delta score of  $>10\%$ ). gnomAD AF, allele frequency (%) in gnomAD database V.2.1.1; Regulatory element, genomic position of regulatory element according to GRCh37/hg19; Identifier; unique identifier of regulatory element as accessible in GeneCards(Stelzer et al. 2016), Enhancer score and Enhancer-gene score of regulatory element as provided by the GeneHancer database; PhyloP(Pollard et al. 2010), nucleotide evolutionary conservation score.

**Table S7: Rare genetic variants located within the CEVA haplotype**

| Genome                               | RefSNP      | Location                    | gnomAD AF (%) | SpliceAI | PhyloP | Repeatmasker | Regulatory element |
|--------------------------------------|-------------|-----------------------------|---------------|----------|--------|--------------|--------------------|
| Chr7:106622156T>A                    | rs6961007   | Intergenic                  | -             | NA       | -5.094 | SINE         | -                  |
| <u>Chr7:106669858G&gt;A (SNP1)</u>   | rs17424561  | Intergenic                  | 3.04          | NA       | -1.806 | -            | -                  |
| Chr7:106690778CTTTT>T                | NA          | Intronic ( <i>PPKAR2B</i> ) | -             | 0.01     | 0.556  | -            | -                  |
| Chr7:106736863C>T                    | rs149440050 | Intronic ( <i>PPKAR2B</i> ) | 3.07          | 0.01     | 0.135  | LINE         | -                  |
| <u>Chr7:106741374T&gt;C (SNP2)</u>   | rs79579403  | Intronic ( <i>PPKAR2B</i> ) | 3.03          | 0.00     | 0.8    | LINE         | GeneHancer         |
| Chr7:106741580ATT>A                  | NA          | Intronic ( <i>PPKAR2B</i> ) | -             | 0.01     | 0      | LINE         | GeneHancer         |
| <u>Chr7:106764419T&gt;A (SNP3)</u>   | rs17425867  | Intronic ( <i>PPKAR2B</i> ) | 3.05          | 0.00     | 0.852  | -            | -                  |
| Chr7:106807591TAAAA>T                | NA          | Intergenic                  | -             | NA       | 0.621  | -            | -                  |
| Chr7:106812322A>AA                   | NA          | Intronic ( <i>HBP1</i> )    | -             | 0.00     | -2.377 | SINE         | -                  |
| <u>Chr7:106815154T&gt;C (SNP4)</u>   | rs117113959 | Intronic ( <i>HBP1</i> )    | 2.93          | 0.05     | -0.481 | -            | -                  |
| <u>Chr7:106837681G&gt;A (SNP5)</u>   | rs17349280  | Intronic ( <i>HBP1</i> )    | 2.90          | 0.01     | 0.275  | -            | -                  |
| <u>Chr7:106930234C&gt;T (SNP6)</u>   | rs117386523 | Intronic ( <i>COG5</i> )    | 2.92          | 0.00     | 0.641  | -            | -                  |
| <u>Chr7:106967931A&gt;G (SNP7)</u>   | rs80149210  | Intronic ( <i>COG5</i> )    | 2.91          | 0.00     | 0.838  | LINE         | -                  |
| <u>Chr7:106993159AT&gt;A (SNP8)</u>  | rs199667576 | Intronic ( <i>COG5</i> )    | 2.96          | 0.00     | -100   | -            | -                  |
| <u>Chr7:107014419A&gt;G (SNP9)</u>   | rs9649298   | Intronic ( <i>COG5</i> )    | 2.90          | 0.00     | 2.769  | -            | -                  |
| Chr7:107081658G>A                    | rs188905420 | Intronic ( <i>COG5</i> )    | 2.31          | 0.00     | -2.019 | SINE         | -                  |
| <u>Chr7:107147622T&gt;C (SNP10)</u>  | rs117714350 | Intronic ( <i>COG5</i> )    | 2.32          | 0.00     | 0.238  | LINE         | -                  |
| <u>Chr7:107242636CT&gt;C (SNP11)</u> | rs199915614 | Intronic ( <i>BCAP29</i> )  | 1.91          | NA       | -100   | -            | -                  |
| <u>Chr7:107282469A&gt;C (SNP12)</u>  | rs150942317 | Intergenic                  | 2.31          | NA       | 0.241  | LTR          | -                  |
| Chr7:107316164G>A                    | rs185507318 | Intronic ( <i>SLC26A4</i> ) | 2.01          | 0.00     | 0.089  | SINE         | -                  |

Rare genetic variants (allele frequency  $\leq 5\%$  gnomAD) that are shared between two individuals that harbor the CEVA allele. SNPs that are part of the previously described CEVA (SNP 1-12) or the V1-CEVA haplotype (SNP 4-12) are underlined. Genome, Genomic position according to GRCh37/hg19; RefSNP, dbSNP reference SNP number; GnomAD AF, allele frequency (%) in gnomAD database V.2.1.1; spliceAI, highest splicing prediction score; RepeatMasker, the interspersed repeats or low complexity DNA sequence at the genomic position according to RepeatMasker; Regulatory element, overlap of the genomic position with a predicted *cis* regulatory element according to GeneHancer V5 or EnhancerAtlas 2.0; NA, not available.

**Table S8: Analyzed ears of affected individuals**

| Class   | Number of subjects (male/female) | Number of EVA ears (male/female) | Number of analyzed ears (male/female) | Average age of subjects and analyzed ears (years) | Average age of analyzed ears (Chao et al. 2019) (years), amount of analyzed ears between brackets |
|---------|----------------------------------|----------------------------------|---------------------------------------|---------------------------------------------------|---------------------------------------------------------------------------------------------------|
| M2      | 11 (5/6)                         | 22 (10/12)                       | 21 (10/11)                            | 13.2                                              | 18.4 (n = 48)                                                                                     |
| M1/CEVA | 10 (6/4)                         | 17 (10/7)                        | 16 (9/7)                              | 12.8                                              | 7.5 (n = 20)                                                                                      |
| M1      | 4 (1/3)                          | 8 (2/6)                          | 8 (2/6)                               | 25 (7, 16, 18 and 59)                             | 15.8 (n = 5)                                                                                      |
| M0/CEVA | 2 (0/2)                          | 3 (0/4)                          | 3 (0/4)                               | 15 (6 and 24)                                     | 10.1 (n = 6)                                                                                      |
| M0      | 10 (5/5)                         | 17 (9/8)                         | 17 (9/8)                              | 14.6                                              | 12.9 (n = 94)                                                                                     |

Table adapted from Chao et al. 2019 (Chao et al. 2019). Only ears with sufficient audiometric data were used in the analysis.



## SUPPLEMENTARY FIGURES

### A SLC048

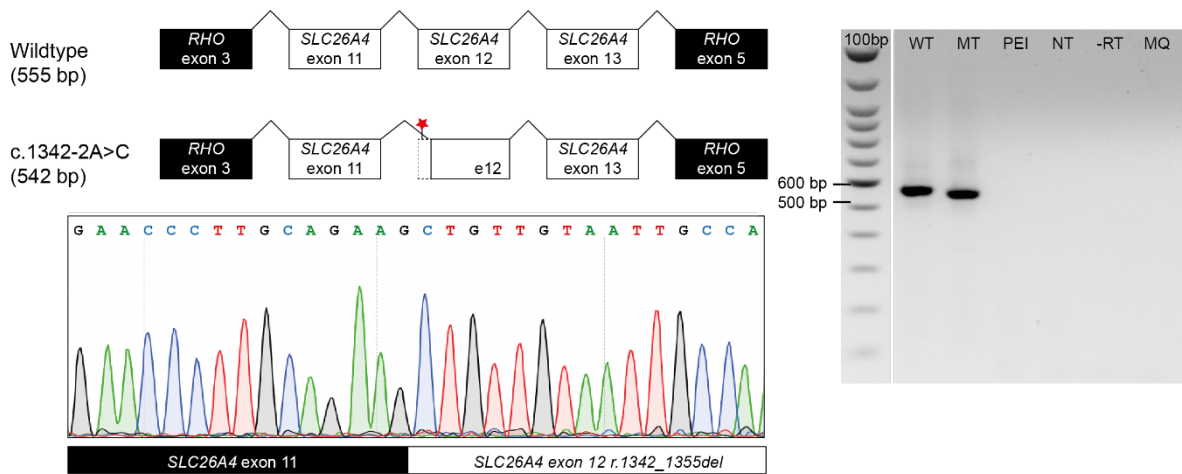

### B SLC085

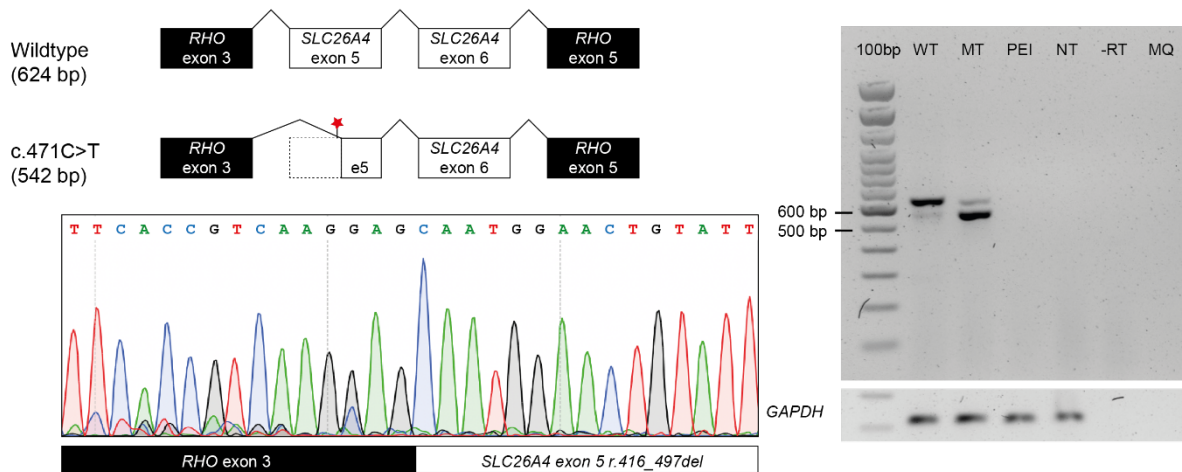

**Figure S1: Results of *in vitro* splice assays for variants in SLC048 and SLC085.** *In vitro* splice assays were performed in HEK293T cells to validate predicted splice defects. **(A)** In SLC048, a canonical splice site *SLC26A4* variant (c.1342-2A>C) was detected. According to SpliceAI predictions, the splice variant (MT) weakens the canonical splice acceptor site. Splice assay results revealed usage of an alternative splice acceptor site located 13 nucleotides downstream. This leads to the formation of a truncated out-of-frame exon 12 (NM\_000441.1:r.1342\_1355del; p.Ser448Leufs\*3). **(B)** In SLC085, a synonymous variant was detected (c.471C>T, p.(Pro157=)). According to SpliceAI, the variant (MT) potentially strengthens an alternative splice acceptor site. The *in vitro* splice assay confirmed that the alternative splice acceptor site (located 27 nucleotides downstream of the variant) is used, which leads to partial exon 5 skipping (NM\_000441.1:r.416\_497del; p.Gly139Alafs\*6,=). Bp, base pair; wt, wildtype; mt, mutant; PEI, transfection reagent-only; RT, reverse transcriptase control; MQ, water control.

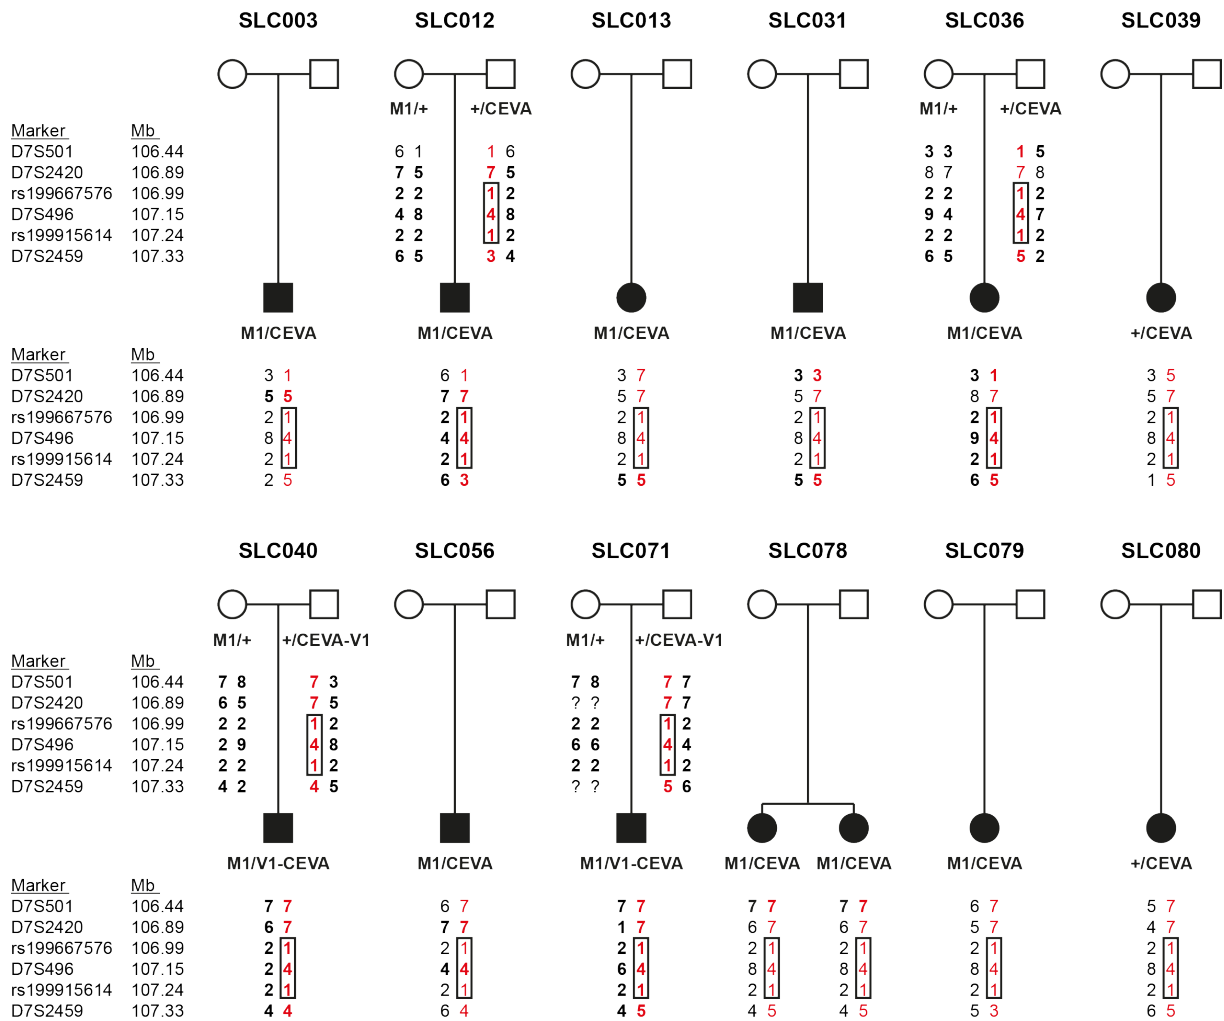

**Figure S2: Family pedigrees with haplotypes of VNTR markers.** The allele carrying the CEVA haplotype is marked in red. VNTR markers for which the phase of the alleles could be conclusively determined via segregation in the family are marked in bold. Genomic positions (Mb) on chromosome 7 are according to the UCSC genome browser (GRCh37/hg19). VNTR markers of the CEVA haplotype are marked in red. A shared haplotype of 0.89 Mb delimited by the markers D7S501 and D7S2459 was identified. A different repeat length was determined for marker D7S2420 in individual SLC003, the marker is still considered to be potentially part of the shared haplotype as a change of repeat length cannot be excluded. +, wildtype allele; M1, (likely) pathogenic *SLC26A4* variant.

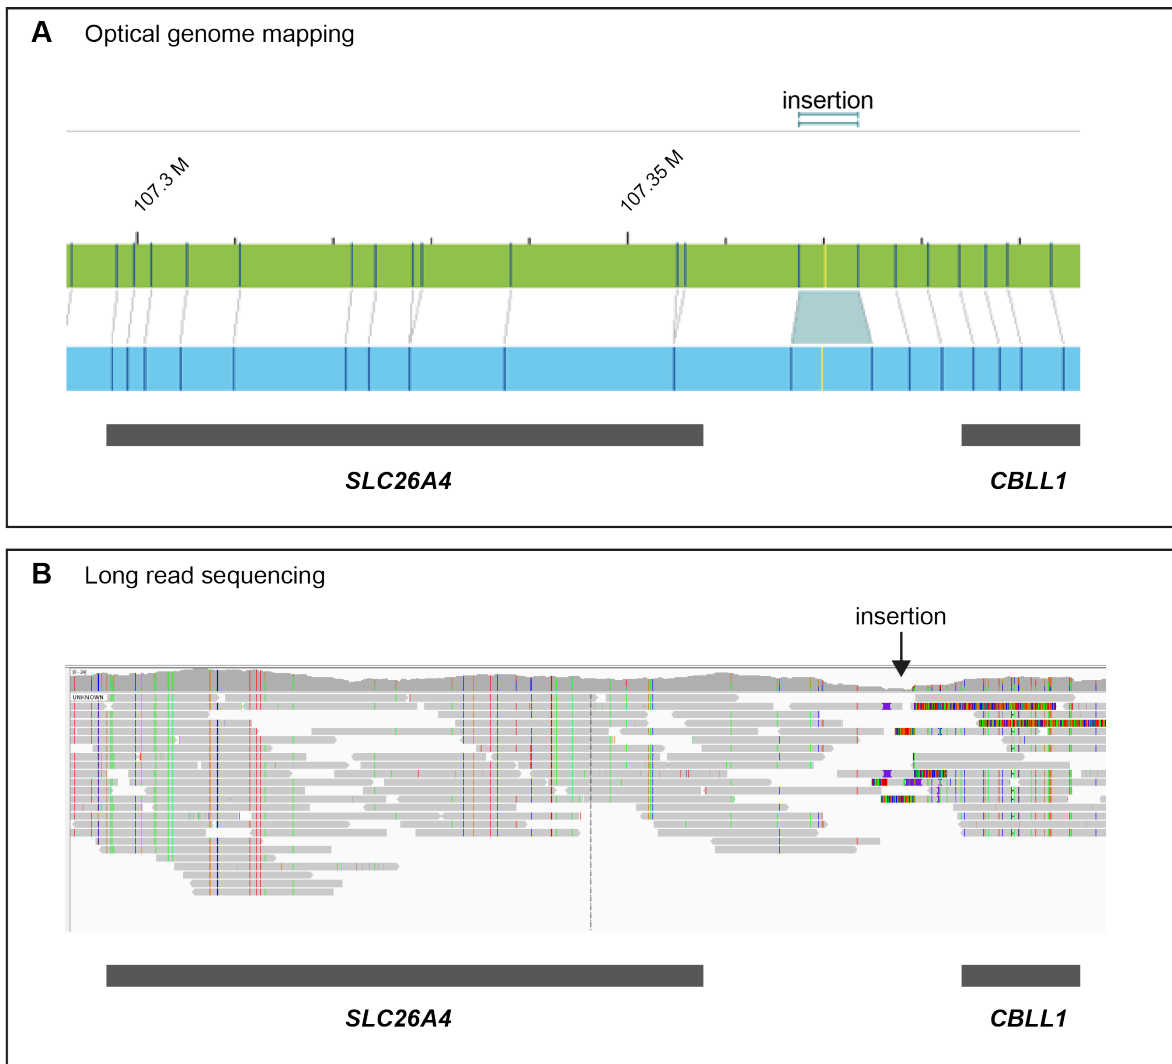

**Figure S3: Optical genome mapping and long-read sequencing.** Optical genome mapping (Bionano Genomics) and long-read sequencing (PacBio) were performed to detect potential structural variants (SVs) that could be present on the CEVA allele. **(A)** Optical genome mapping was performed using ultra-high molecular weight DNA isolated from peripheral blood cells from individual SLC012 (M1/CEVA). No SVs within the CEVA region or *SLC26A4* were called. One insertion event was called just telomeric from the CEVA-haplotype, but was also called in 100% of the control samples. **(B)** Hi-Fi sequencing reads visualized in IGV software. PacBio long-read sequencing was performed on genomic DNA isolated from peripheral blood from individual SLC079 (M1/CEVA). After sequencing analyses, no SVs remained that were present within the CEVA region or *SLC26A4*. The same insertion event as depicted in A was detected using PacBio sequencing, but was also present in control data. The insertion event is therefore considered a reference problem and not a true SV.

# M0

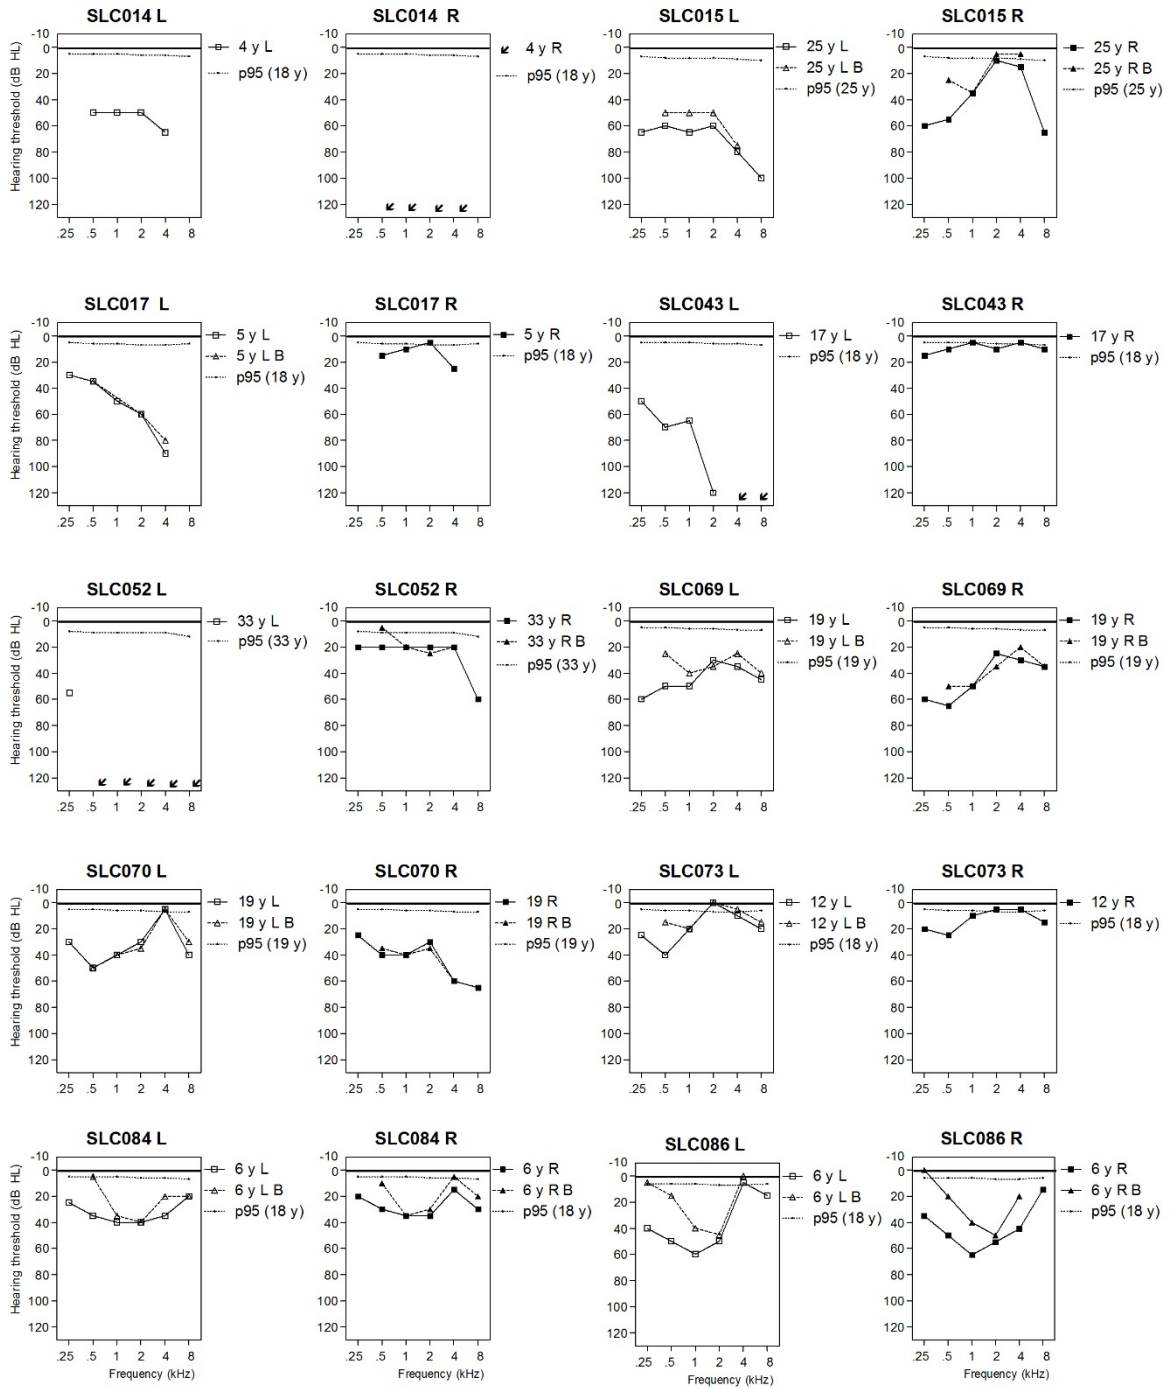

Figure continues on next page

# M0/CEVA

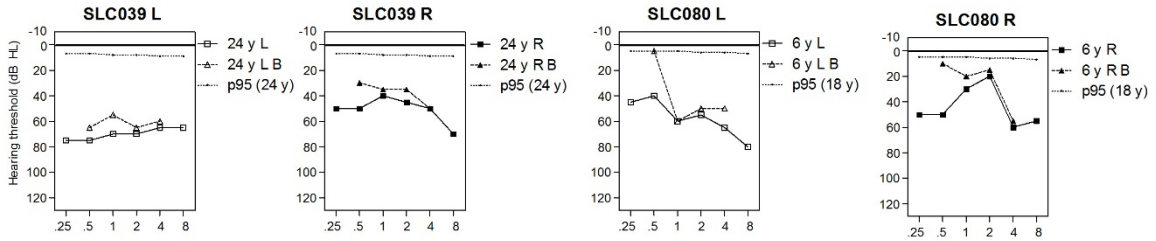

# M1

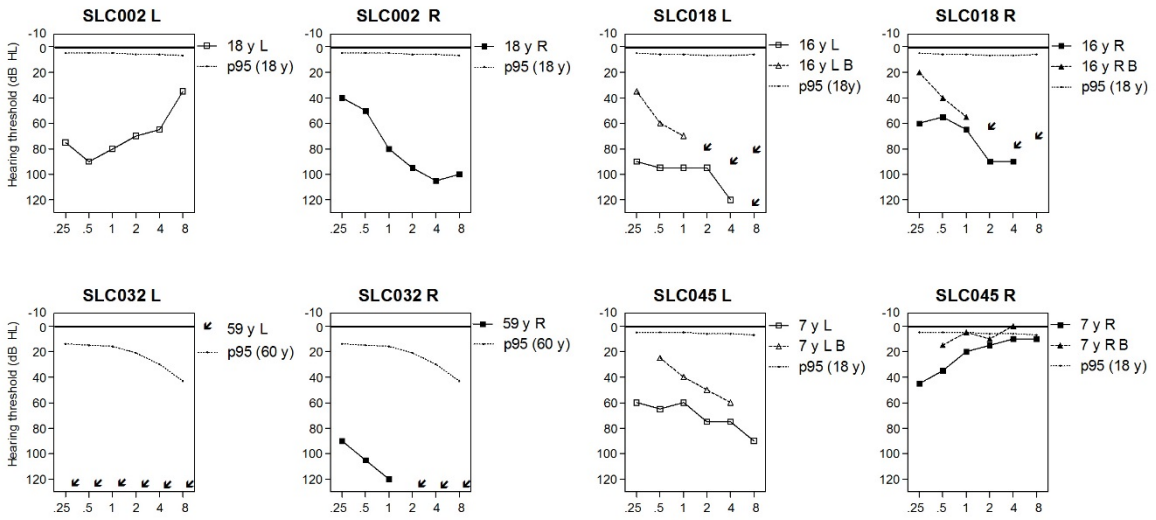

# M1/(V1)-CEVA

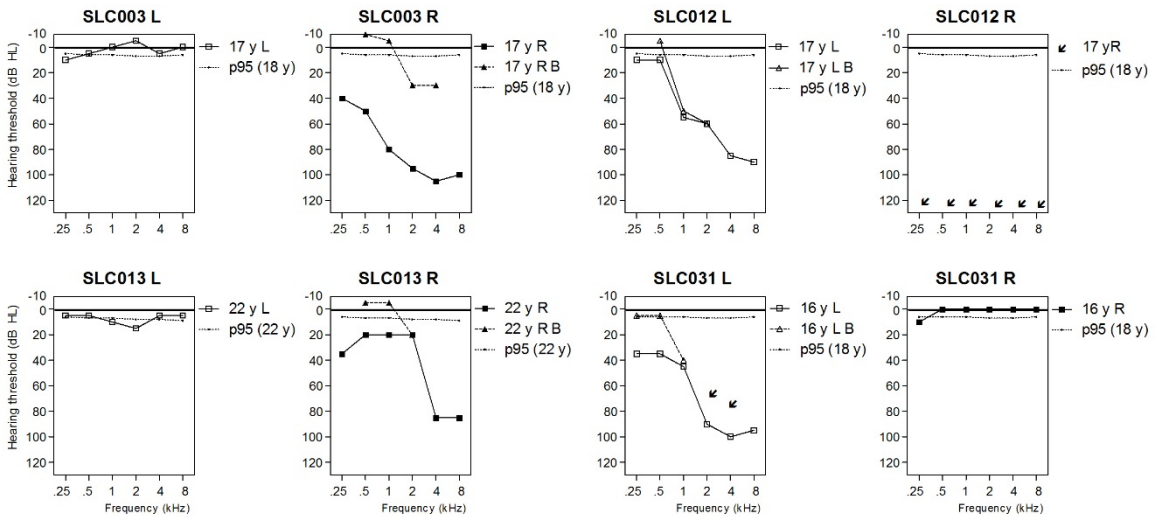

Figure continues on next page

## M1/(V1-)CEVA (continued)

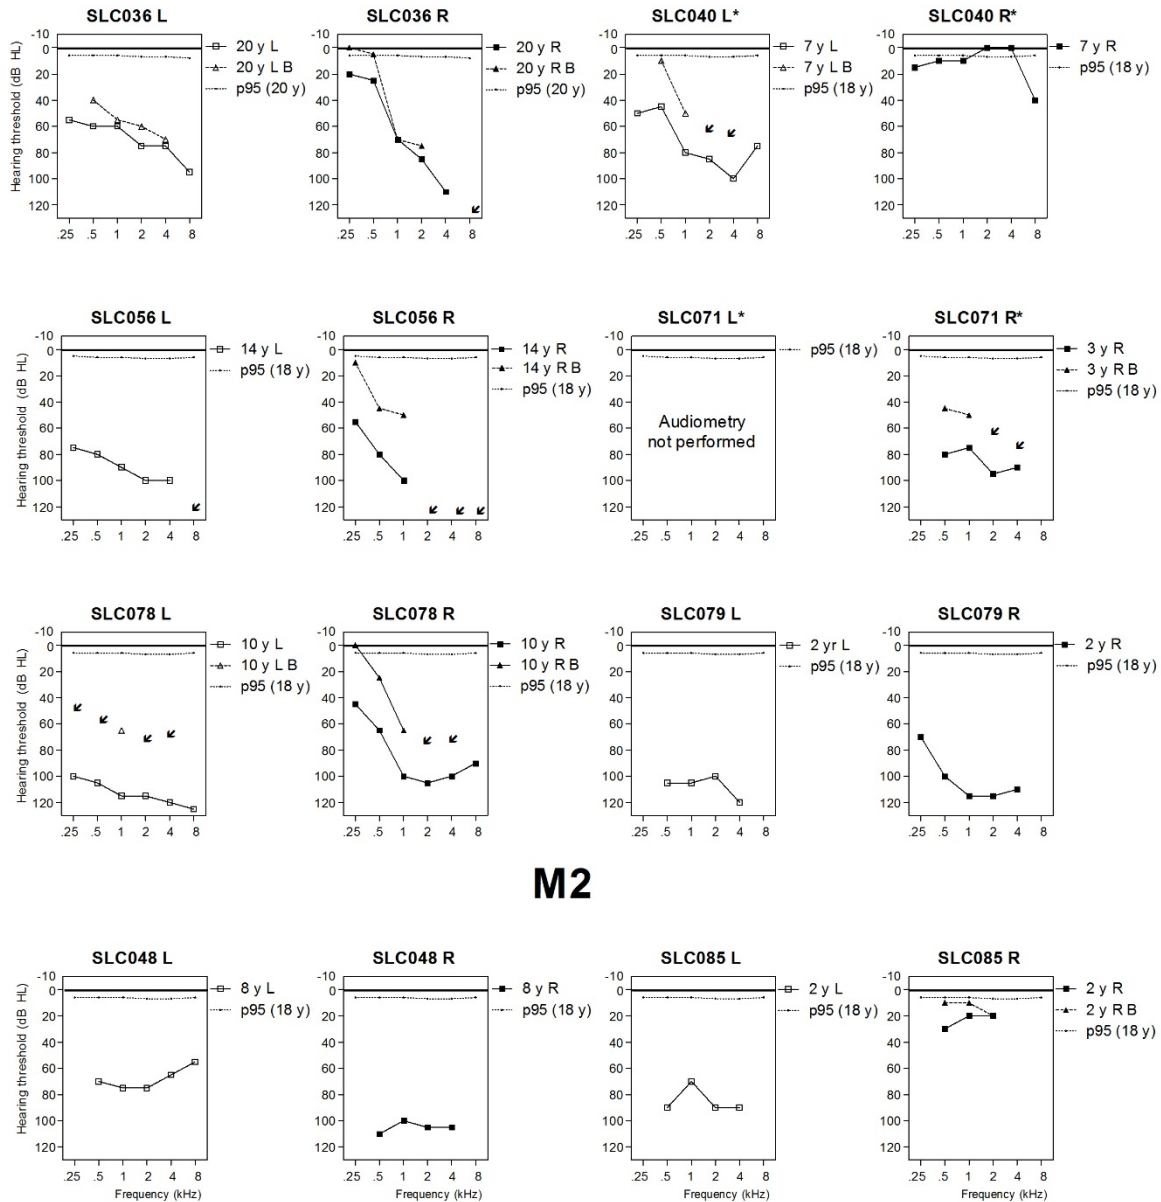

## M2

**Figure S4: Pure tone audiometry of affected individuals** Air, and if available, bone conduction thresholds of all subjects are depicted, except for subjects of the M2 reference cohort. The p95 values are matched to the individuals' sex and age at the most recent audiometry, according to the ISO 7029:2017 standard. The age range for which the ISO 7029:2017 can be applied is 18 to 70 years. Black arrows: threshold could not be measured. The CEVA haplotype was detected in 8 individuals, in an additional 2 individuals (SLC040 and SLC071, indicated with \*), a smaller haplotype was found, termed V1-CEVA. y, age in years; R, right; L, left; B, bone conduction; dB HL, decibel hearing level; kHz, kiloHertz.

## SUPPLEMENTARY REFERENCES

- Chao JR, Chattaraj P, Munjal T, Honda K, King KA, Zalewski CK, Chien WW, Brewer CC, Griffith AJ (2019) SLC26A4-linked CEVA haplotype correlates with phenotype in patients with enlargement of the vestibular aqueduct. *BMC Medical Genetics* 20: 118. doi: 10.1186/s12881-019-0853-4
- Fishilevich S, Nudel R, Rappaport N, Hadar R, Plaschkes I, Iny Stein T, Rosen N, Kohn A, Twik M, Safran M, Lancet D, Cohen D (2017) GeneHancer: genome-wide integration of enhancers and target genes in GeneCards. *Database (Oxford)* 2017: bax028. doi: 10.1093/database/bax028
- Fornes O, Castro-Mondragon JA, Khan A, van der Lee R, Zhang X, Richmond PA, Modi BP, Correard S, Gheorghe M, Baranašić D, Santana-Garcia W, Tan G, Chèneby J, Ballester B, Parcy F, Sandelin A, Lenhard B, Wasserman WW, Mathelier A (2020) JASPAR 2020: update of the open-access database of transcription factor binding profiles. *Nucleic Acids Research* 48: d87-d92. doi: 10.1093/nar/gkz1001
- Gao T, Qian J (2020) EnhancerAtlas 2.0: an updated resource with enhancer annotation in 586 tissue/cell types across nine species. *Nucleic Acids Research* 48: d58-d64. doi: 10.1093/nar/gkz980
- Oza AM, DiStefano MT, Hemphill SE, Cushman BJ, Grant AR, Siegert RK, Shen J, Chapin A, Boczek NJ, Schimmenti LA, Murry JB, Hasadsri L, Nara K, Kenna M, Booth KT, Azaiez H, Griffith A, Avraham KB, Kremer H, Rehm HL, Amr SS, Abou Tayoun AN (2018) Expert specification of the ACMG/AMP variant interpretation guidelines for genetic hearing loss. *Hum Mutat* 39: 1593-1613. doi: 10.1002/humu.23630
- Pollard KS, Hubisz MJ, Rosenbloom KR, Siepel A (2010) Detection of nonneutral substitution rates on mammalian phylogenies. *Genome Research* 20: 110-121. doi: 10.1101/gr.097857.109
- Stelzer G, Rosen N, Plaschkes I, Zimmerman S, Twik M, Fishilevich S, Stein TI, Nudel R, Lieder I, Mazor Y, Kaplan S, Dahary D, Warshawsky D, Guan-Golan Y, Kohn A, Rappaport N, Safran M, Lancet D (2016) The GeneCards suite: from gene data mining to disease genome sequence analyses. *Current Protocols in Bioinformatics* 54: 1.30.1-1.30.33. doi: <https://doi.org/10.1002/cpbi.5>
